# Supplementary material for: A Hidden Structural Variation in a Known IRD Gene: A Cautionary Tale of Two New Disease Candidate Genes
Source: bioRxiv or medRxiv preprint supplement (doi:10.1101/2021.10.29.21265657), 2021-10-30
Supplement: Supplementary file [file media-1.pdf]

**Table S1.**

| <b>Primer name</b>           | <b>Sequence</b>             |
|------------------------------|-----------------------------|
| <b>Cloning</b>               |                             |
| GNLS_exon11_splice_F         | CACCTGACTGTGCTGAGTCTGTTC    |
| GNLS_exon11_splice_R         | TTAACTCATGGAGGACACAC        |
| GNLS_exon15_splice_F         | CACCAATTGTGTGTCGCTGCTGTC    |
| GNLS_exon15_splice_R         | AGTTCAGCTAGCTGGTACAG        |
| PRPF31_F                     | TGGCAGATGAGCTCTTAGCT        |
| PRPF31_F                     | GGCTTGCTTGCTGATATACTCC      |
| PRPF31_dup_F3                | TCGATCGCTGGCTCCTCTTCT       |
| PRPF31_dup_R3                | GGAGGAGACACAGCTGGATCTT      |
| <b>Zebrafish</b>             |                             |
| Morpholino ex1_gnl3          | AGAATTAACAACACTCACTCGGTCTCT |
| Morpholino TB_gnl3           | CAACTTCGGTCTCTTCATGTCTGCC   |
| cDNA analysis F_gnl3         | GAAGTGAGGAGTTGAGACAC        |
| cDNA analysis R_gnl3         | CAGCTTCTCGAAGCACTTCC        |
| Morpholino-ex2_pde4dip       | GCGCTACCAACTTTATACCTACCCA   |
| Morpholino-ex18_pde4dip      | TGCCGAATCCTGCGAGATTGATTGT   |
| cDNA-ex2 analysis F_pde4dip  | GATCAGAGCCACAGAAGAGAG       |
| cDNA-ex2 analysis R_pde4dip  | GAAGTTCTCCTTCTTCAGGTC       |
| cDNA-ex18 analysis F_pde4dip | GCAGACAGACTCAAGAGCAT        |
| cDNA-18 analysis R_pde4dip   | GCTTCCTGACTTCCACCTT         |
| exon 4c sgRNA_pde4dip        | GCGAGGATGTTCCACCGCAGGG      |
| exon 13 sgRNA_pde4dip        | CCGTACAACGACACCGGGAGG       |
| exon 4c GUIDE-IT F_pde4dip   | AGAATCAAGTGCTACTGGTG        |
| exon 4c GUIDE-IT R_pde4dip   | GAGTGCAATAGTTAGTTCAC        |
| exon 13 GUIDE-IT F_pde4dip   | GAGCTTCTGTGCTCTCTAAA        |
| exon 13 GUIDE-IT R_pde4dip   | GCTCGTCTTACTTGTACCAG        |
| exon 4c NGS F_pde4dip        | CCTCAATGACCTGAAGAAGG        |
| exon 4c NGS R_pde4dip        | GTGGCTAATAACTGCCTGCC        |
| exon 13 NGS F_pde4dip        | CTTCAGAGGACACAGCAGCAG       |
| exon 13 NGS R_pde4dip        | CAGTCAGCAGGTCTGGTTG         |

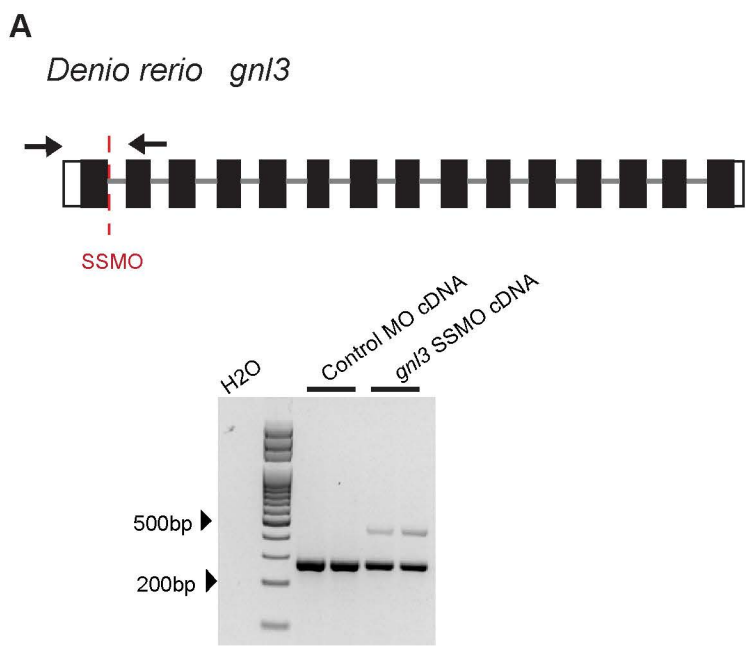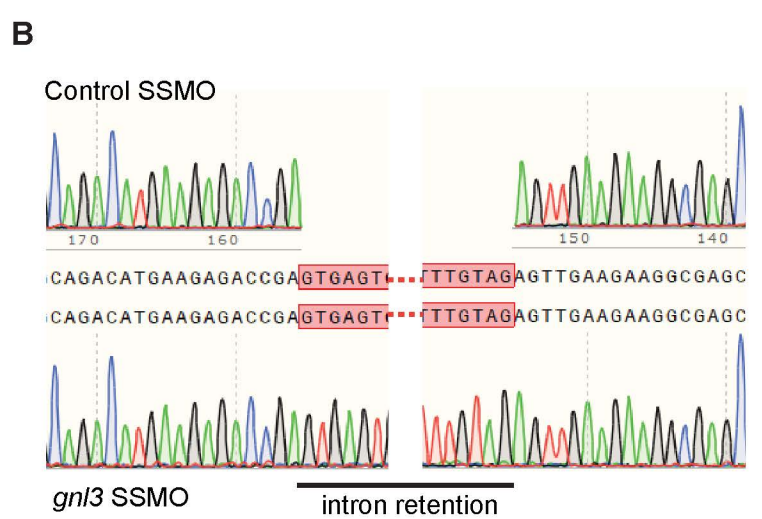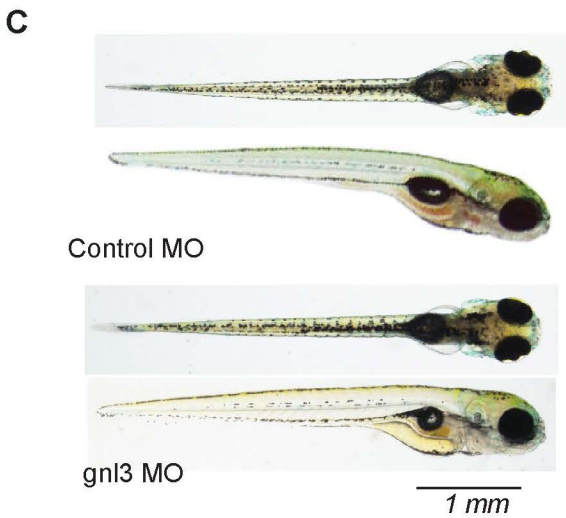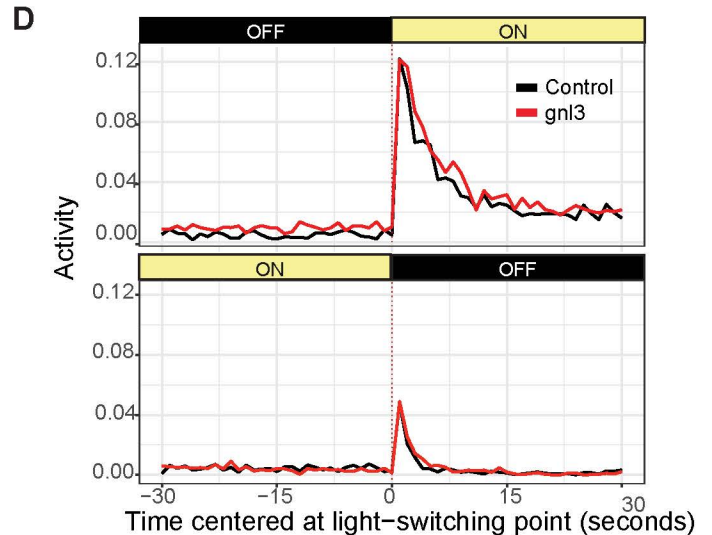

**Figure S1.** Functional studies in Zebrafish homolog *gnl3*. **(A)** Schematic of *D. rerio gnl3* with splice site morpholino (SSMO) targeting the exon/intron boundary of exon 1 indicated in a dashed red line and PCR primers indicated as black arrows. Below are results from RT-PCR performed on RNA isolated from control and *gnl3* morphant fish at 5 dpf, where upper band indicates intron retention in *gnl3* SSMO cDNA. **(B)** Chromatogram from Sanger sequencing of control and *gnl3* morphants, showing retained intron (black line and red boxes highlighting intronic sequences). **(C)** Zebrafish injected with control MO (top) and *gnl3* MO (bottom) at 5dpf with no observable differences in development or morphology. **(D)** Visual motor response (VMR) was performed on morphants at 5 dpf. The graph shows no significant difference between control MO (black, n=65) and *gnl3* MO knockdown (red, n=67) in either OFF/ON response (Tukey HSD,  $p=0.6352$ ) or ON/OFF response (Tukey HSD  $p=0.8733$ ).

**A** *D. rerio pde4dip*

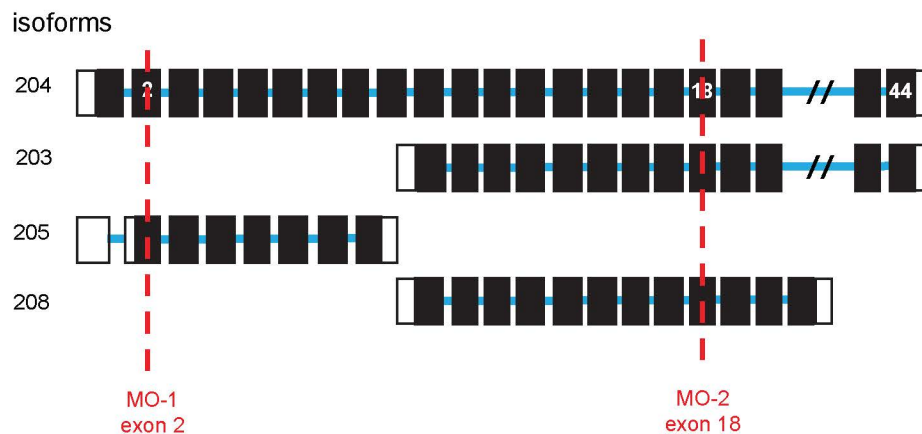

**B**

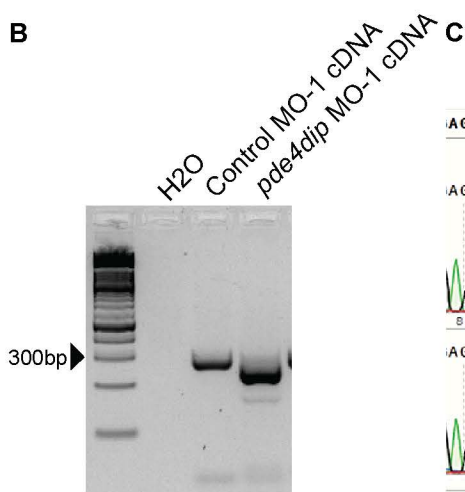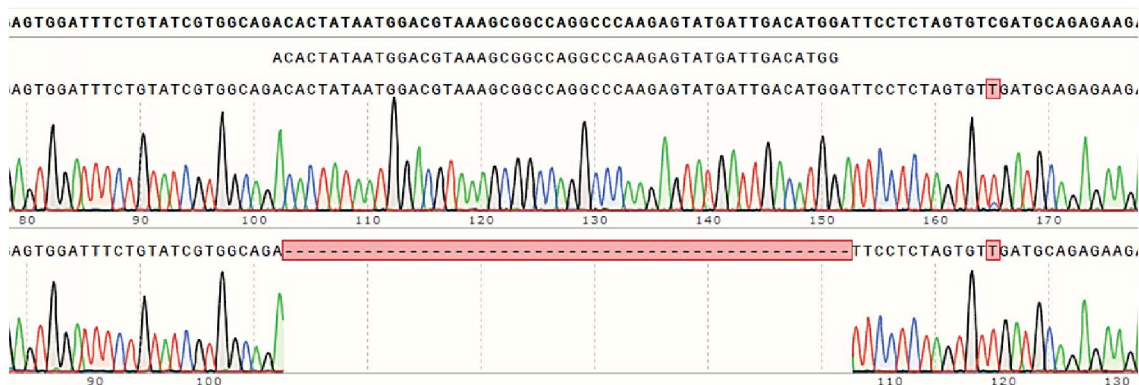

**D**

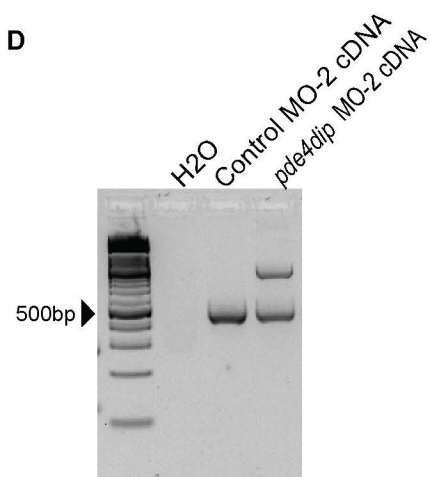

**E**

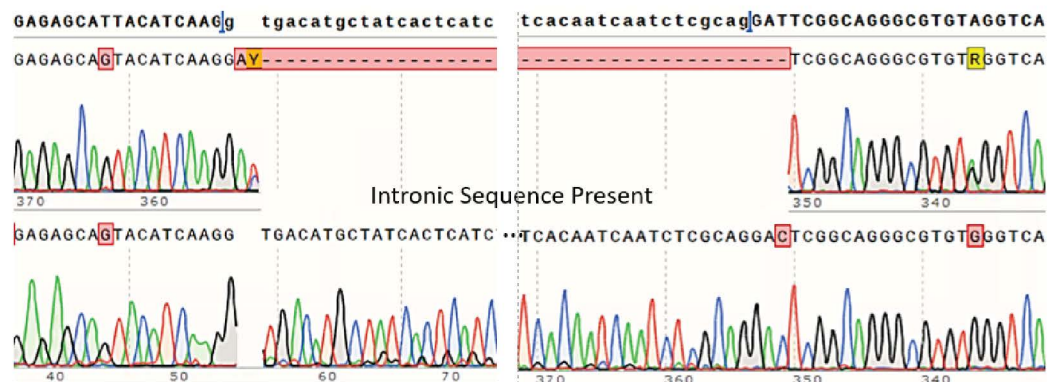

**Figure S2.** Functional studies in Zebrafish homolog *pde4dip*. **(A)** Schematic of *D. rerio pde4dip* depicts design of morpholinos to target exons 2 (MO-1) and 18 (MO-2) to ensure sufficient knock down of all isoforms. Morpholino targets are indicated with a dashed red line. **(B)** RT-PCR on RNA isolated from control and *pde4dip* morphant fish at 5 dpf to verify MO-1 efficiency. The last lane shows a lower band compared to control indicating exon skipping in *pde4dip* MO-1. **(C)** Sanger sequence demonstrating exon skipping due to MO-1. **(D)** RT-PCR on RNA isolated from control and *pde4dip* morphant fish at 5 dpf to verify MO-2 efficiency, where the upper band in the last lane indicates intron retention in *pde4dip* MO-2, with the lower band is similar to control MO. **(E)** Sanger sequence demonstrating intron retention due to MO-2.

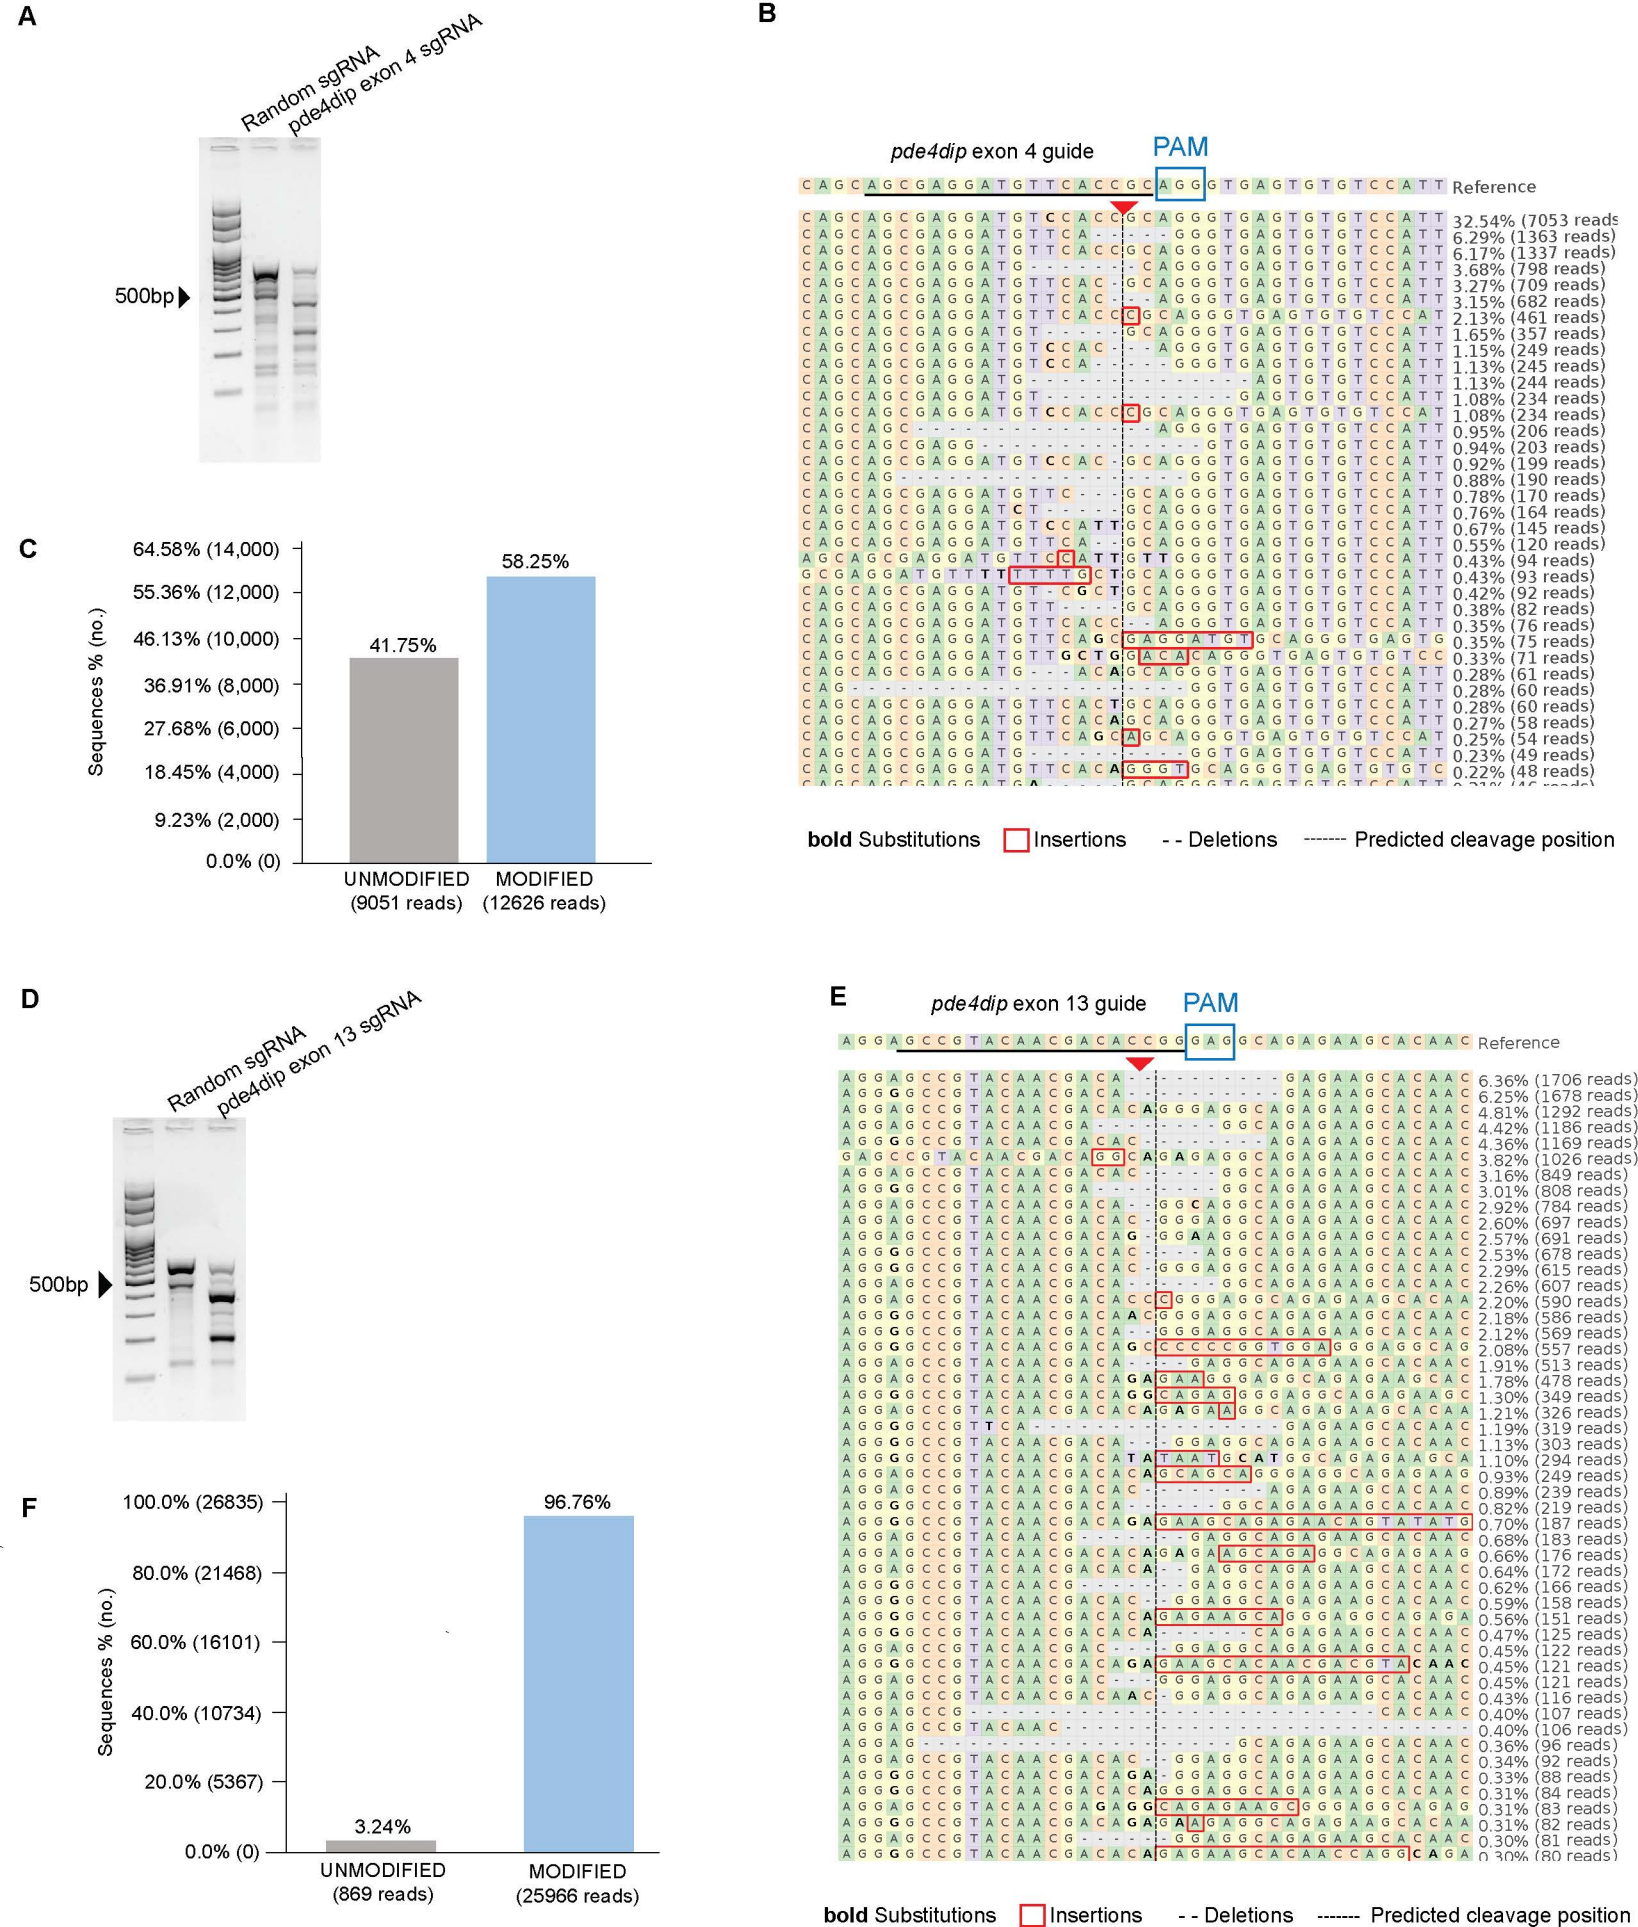

**Figure S3.** Validation of *pde4dip* CRISPR-cas9-editing in zebrafish. **(A)** T7E1 assay was performed on genomic DNA isolated from injected embryos to test for the editing efficiency of sgRNA exon 4 *in vivo*. The last lane shows the depletion of the upper band compared to control, and lower bands indicate cutting in *pde4dip*-edited fish. **(B)** NGS analysis of genome editing of *pde4dip* exon 4 guide. Predicted cleavage site (dashed line) surrounded by editing events including substitutions (bold), insertions (red box), and deletions (- - -). Targeted sequence is underlined with protospacer adjacent motif (PAM) shown in blue box. Genomic DNA was isolated from random sgRNA control and *pde4dip*-edited fish at 5dpf. **(C)** Quantification of editing efficiencies show 58.25% of reads have been successfully modified. **(D)** T7E1 assay performed on genomic DNA to test editing efficiency. The last lane show lower bands compared to control that indicates cutting in *pde4dip* exon 13 sgRNA. **(E)** NGS analysis of genome editing of *pde4dip* exon 13 guide. Predicted cleavage site (dashed line) surrounded by editing events including substitutions (bold), insertions (red box), and deletions (- - -). Targeted sequence is underlined with protospacer adjacent motif (PAM) shown in blue box. Genomic DNA was isolated from random sgRNA control and *pde4dip*-edited fish at 5dpf. **(F)** Quantification of editing efficiencies show 96.76% of reads have been successfully modified. (CRISPResso2 <http://crispresso.pinellolab.partner.org/>)

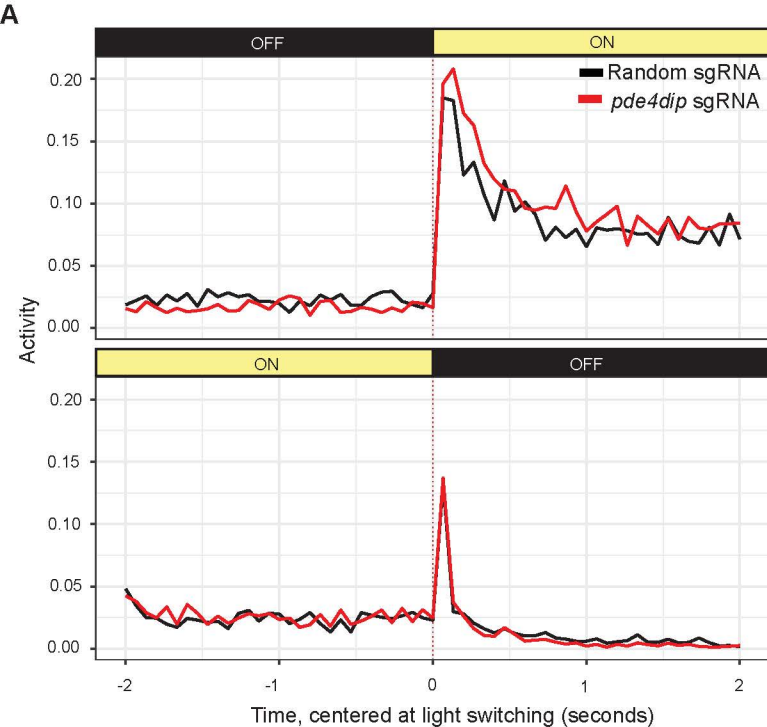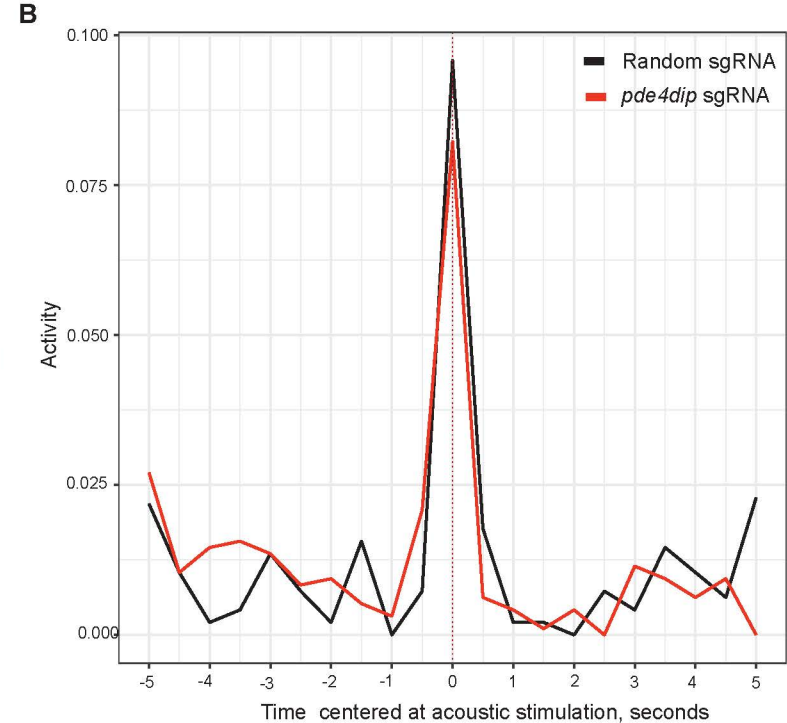

**Figure S4. (A)** VMR assay was performed on *pde4dip* CRISPR-Cas9 edited fish at 5 dpf. The graph shows no significant difference between random sgRNA (black,  $n=48$ ) and *pde4dip* sgRNA knockdown (red,  $n=48$ ) in either OFF/ON response (t-test,  $p=0.8079$ ) or ON/OFF response (t-test,  $p=0.5417$ ). **(B)** AEBR assay performed on *pde4dip* CRISPR-Cas9 edited fish at 5 dpf shows no significant difference in response to stimuli between *pde4dip* sgRNA (red,  $n=32$ ) and fish injected with random sgRNA (black,  $n=32$ ) (t-test,  $p=0.6465$ ).
